# Supplementary material for: Solvent-free chemoselective oxidation of thioethers and thiophenes by mechanical milling
Source: Royal Society of Chemistry journal article supplement (doi:10.1039/c2cc36365h), 2012-01-01
Supplement: c2cc36365h.pdf [file c2cc36365h.pdf]

Cite this: DOI: 10.1039/c0xx00000x

www.rsc.org/xxxxxx

COMMUNICATION

## Solvent-free chemoselective oxidation of thioethers and thiophenes by mechanical milling

Giancarlo Cravotto,<sup>a\*</sup> Davide Garella,<sup>a</sup> Diego Carnaroglio,<sup>a</sup> Emanuela Calcio Gaudino<sup>a</sup> and Ornelio Rosati.<sup>b</sup>

<sup>a</sup>Dipartimento di Scienza e Tecnologia del Farmaco, University of Turin, Via P. Giuria 9, I-10125 Turin, Italy

<sup>b</sup>Dipartimento di Chimica e Tecnologia del Farmaco. Via del liceo 1, I-06123 Perugia, Italy

\* To whom correspondence should be addressed. E-mail: giancarlo.cravotto@unito.it

### SUPPLEMENTARY INFORMATION

#### Materials

Commercially available reagents and solvents were purchased from Sigma Aldrich, and used without further purification.

#### Characterization

IR spectra were recorded with a Shimadzu FT-IR 8001 spectrophotometer. Nuclear magnetic resonance spectra (<sup>1</sup>H and <sup>13</sup>C NMR) were recorded on a Bruker Avance 300 spectrometer respectively at 300 MHz and 75 MHz (25°C). Chemical shifts were calibrated to the CDCl<sub>3</sub> (for <sup>1</sup>H NMR, 7.27 and for <sup>13</sup>C NMR, 77.16). Gaschromatography-mass spectrometry (GC-MS) analyses were performed in a gaschromatograph Agilent 6890 (Agilent Technologies - USA) fitted with a mass detector Agilent Network 5973. Total sulphur amount was measurement with elemental analyzer multi EA<sup>®</sup> 5000.

Cite this: DOI: 10.1039/c0xx00000x

www.rsc.org/xxxxxx

COMMUNICATION

| Substrate                                                                           | Analytical data                                                                                                                                                                                                                                                                                                                                                                                                                                                                                                                                                                                                                    |
|-------------------------------------------------------------------------------------|------------------------------------------------------------------------------------------------------------------------------------------------------------------------------------------------------------------------------------------------------------------------------------------------------------------------------------------------------------------------------------------------------------------------------------------------------------------------------------------------------------------------------------------------------------------------------------------------------------------------------------|
| 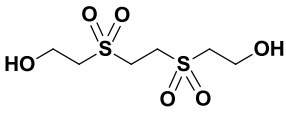   | V. Tak <i>et. al</i> , <i>Rapid. Commun. Mass Spectrom.</i> 2006, <b>20</b> , 2387-2394                                                                                                                                                                                                                                                                                                                                                                                                                                                                                                                                            |
|    | <b>MS:</b> 184 [M <sup>+</sup> ], 169 [M – CH <sub>3</sub> <sup>+</sup> ], 122, 105 [M – CH <sub>3</sub> SO <sub>2</sub> ] <sup>+</sup> (100%), 77, 51<br><b><sup>1</sup>H NMR, <sup>13</sup>C NMR:</b> A. Ulman <i>et al</i> , <i>J. Org. Chem.</i> 1989, <b>54</b> , 4691-4692<br><b>IR:</b> 2924, 1702, 1293 ( <i>asymm. stretch.</i> SO <sub>2</sub> ), 1149 ( <i>symm. stretch.</i> SO <sub>2</sub> ), 1084, 963, 766, 695, 564, 529                                                                                                                                                                                          |
|  | Commercially available reagent. CAS N. 825-44-5                                                                                                                                                                                                                                                                                                                                                                                                                                                                                                                                                                                    |
|  | <b>MS:</b> 208 [M] <sup>+</sup> , 193 [M – CH <sub>3</sub> ] <sup>+</sup> (100%), 137, 109, 75, 43 [CH <sub>3</sub> CO] <sup>+</sup><br><b><sup>1</sup>H NMR:</b> 7.86 (s, 1H, H3), 7.79 (d, 1H, H7, J = 6.0 Hz), 7.64 (m, 2H, H5-H6), 7.57 (d, 1H, H4, J = 6.0 Hz), 2.60 (s, 3H, Me)<br><b><sup>13</sup>C NMR:</b> 188.2 (-CO-), 140.6 (C8), 137.7 (C2), 137.4 (C3), 133.8 (C5), 133.2 (C6), 128.1 (C9), 127.4 (C4), 121.7 (C7), 26.2 (CH <sub>3</sub> CO-)<br><b>IR:</b> 3058, 2924, 1670 (CO), 1568, 1302 ( <i>asymm. stretch.</i> SO <sub>2</sub> ), 1279, 1195, 1153 ( <i>symm. stretch.</i> SO <sub>2</sub> ), 764, 541, 529 |
|  | Commercially available reagent. CAS N. 825-44-5                                                                                                                                                                                                                                                                                                                                                                                                                                                                                                                                                                                    |
|  | K. Sato <i>et.al</i> , <i>Tetrahedron</i> 2001, <b>57</b> , 2469-2476                                                                                                                                                                                                                                                                                                                                                                                                                                                                                                                                                              |

Cite this: DOI: 10.1039/c0xx00000x

www.rsc.org/xxxxxx

# COMMUNICATION

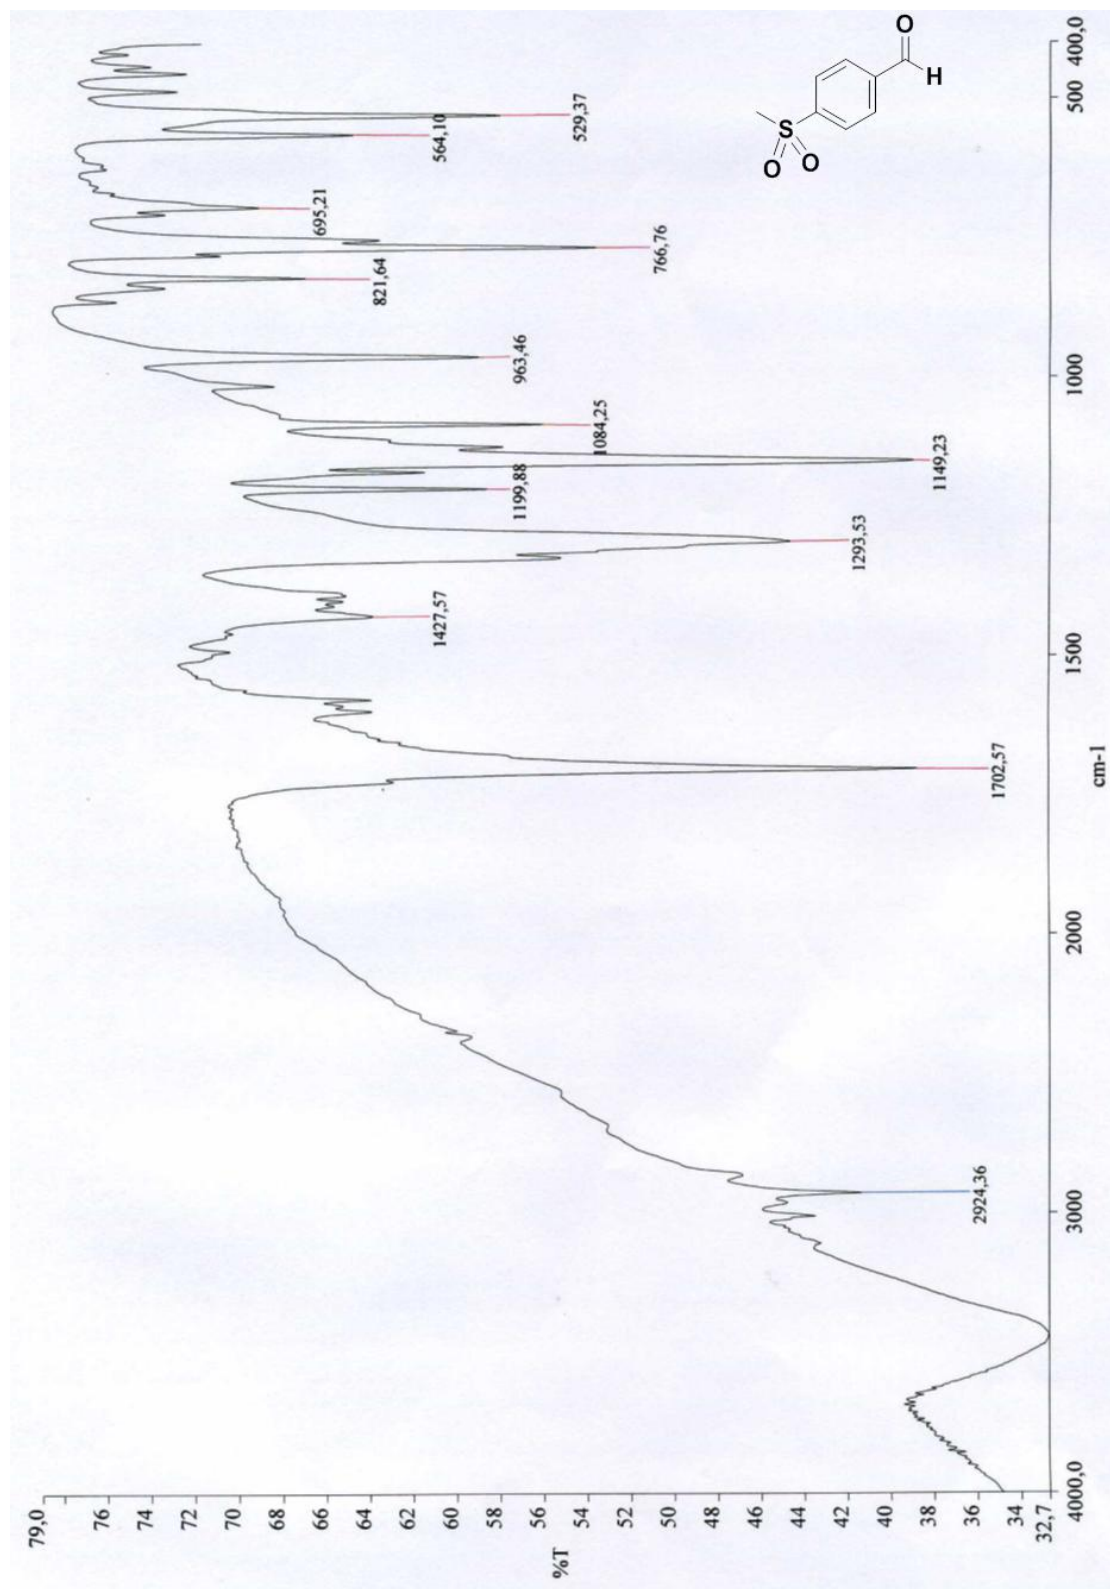

Fig. 1. FT-IR spectra.

Cite this: DOI: 10.1039/c0xx00000x

www.rsc.org/xxxxxx

COMMUNICATION

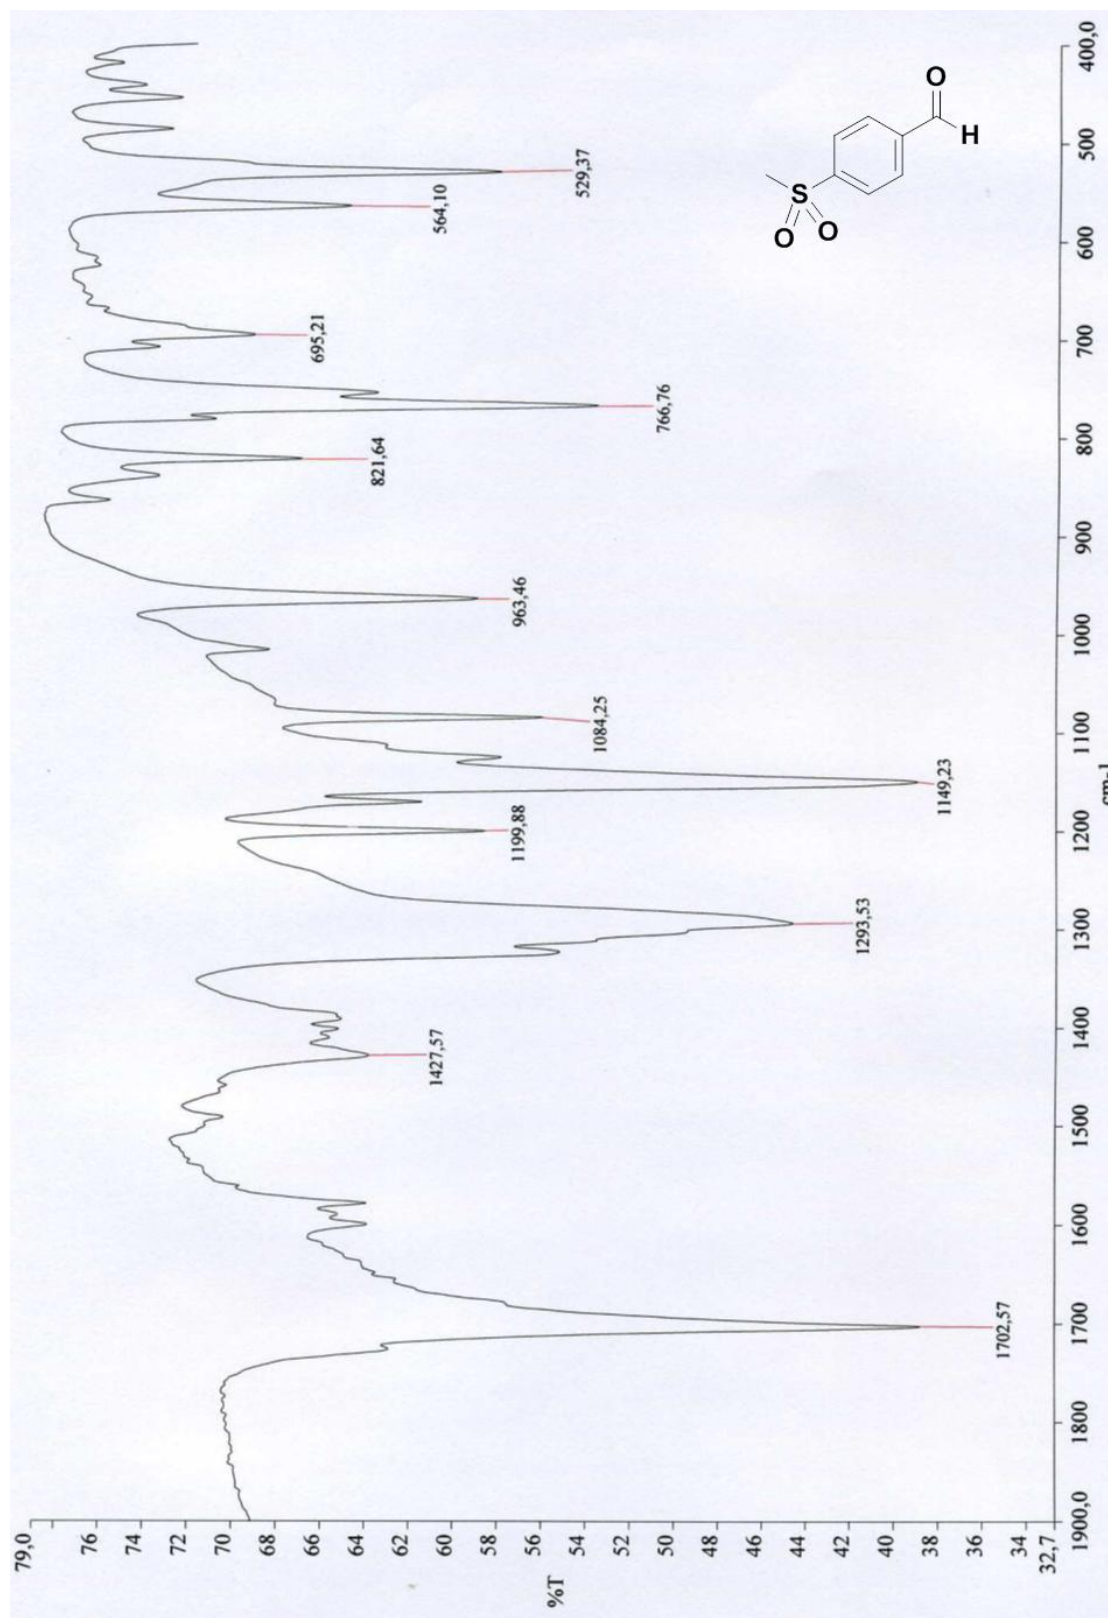

Fig. 2. FT-IR spectra.

Cite this: DOI: 10.1039/c0xx00000x

www.rsc.org/xxxxxx

COMMUNICATION

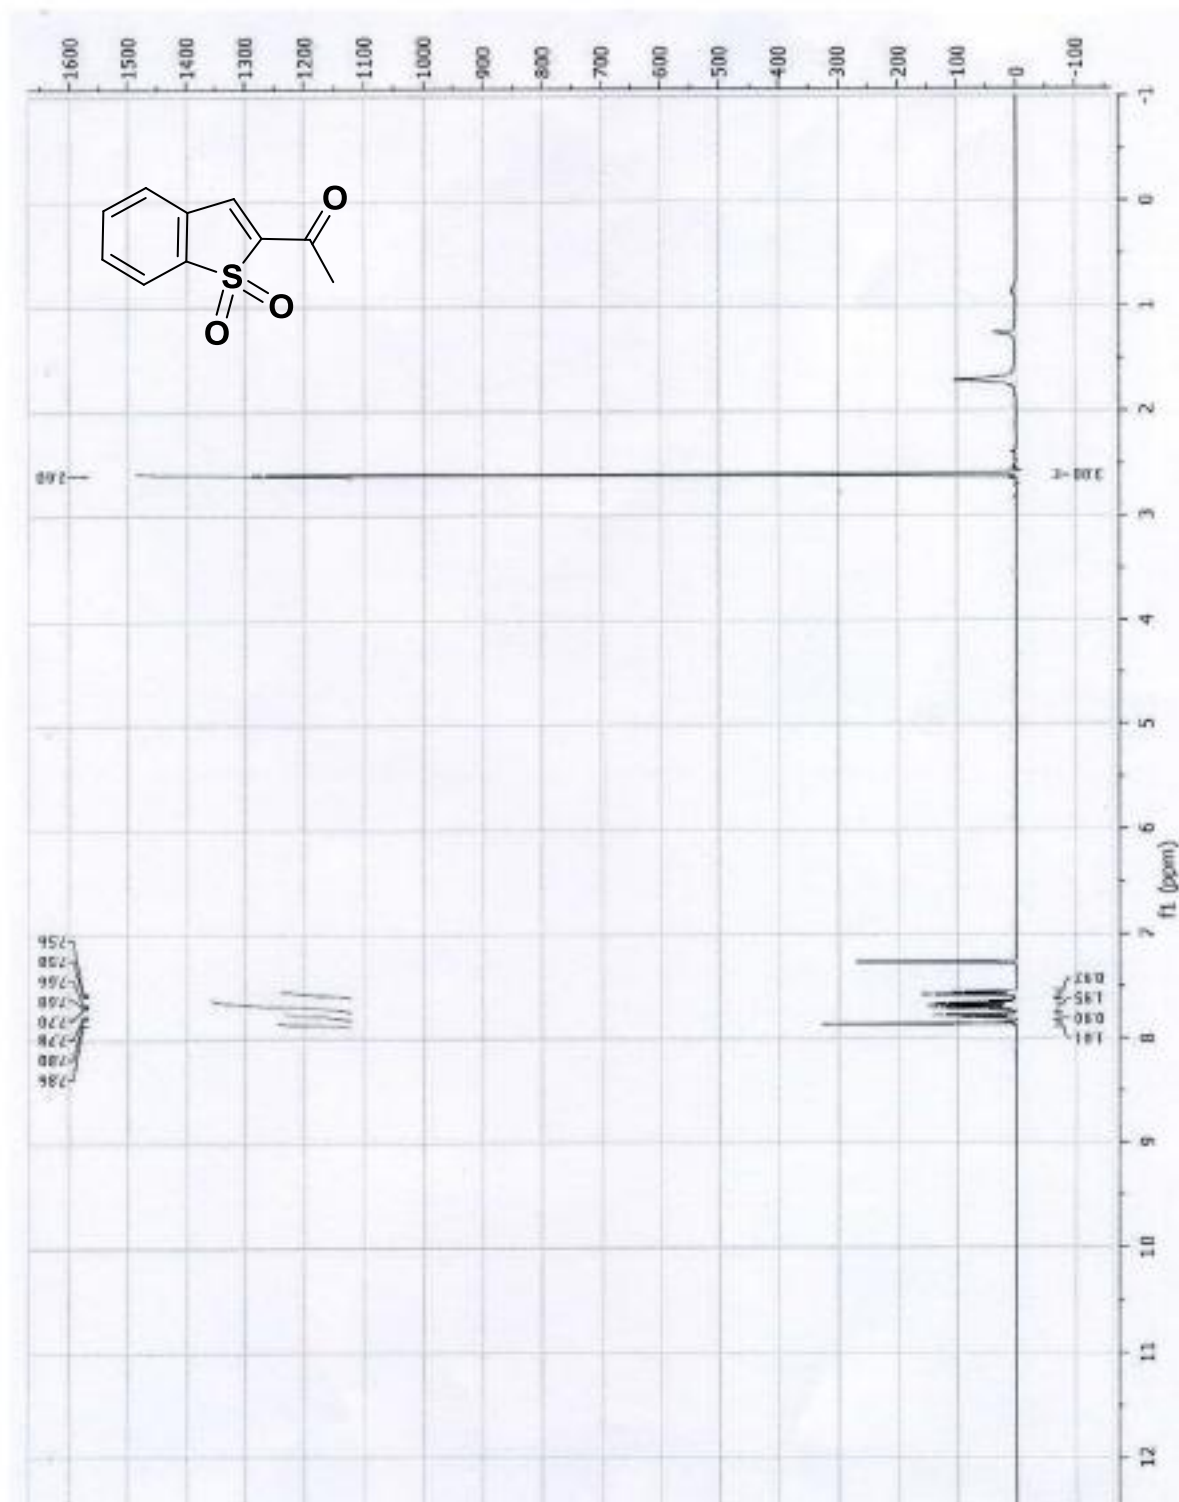

Fig. 3. <sup>1</sup>H NMR.

Cite this: DOI: 10.1039/c0xx00000x

www.rsc.org/xxxxxx

COMMUNICATION

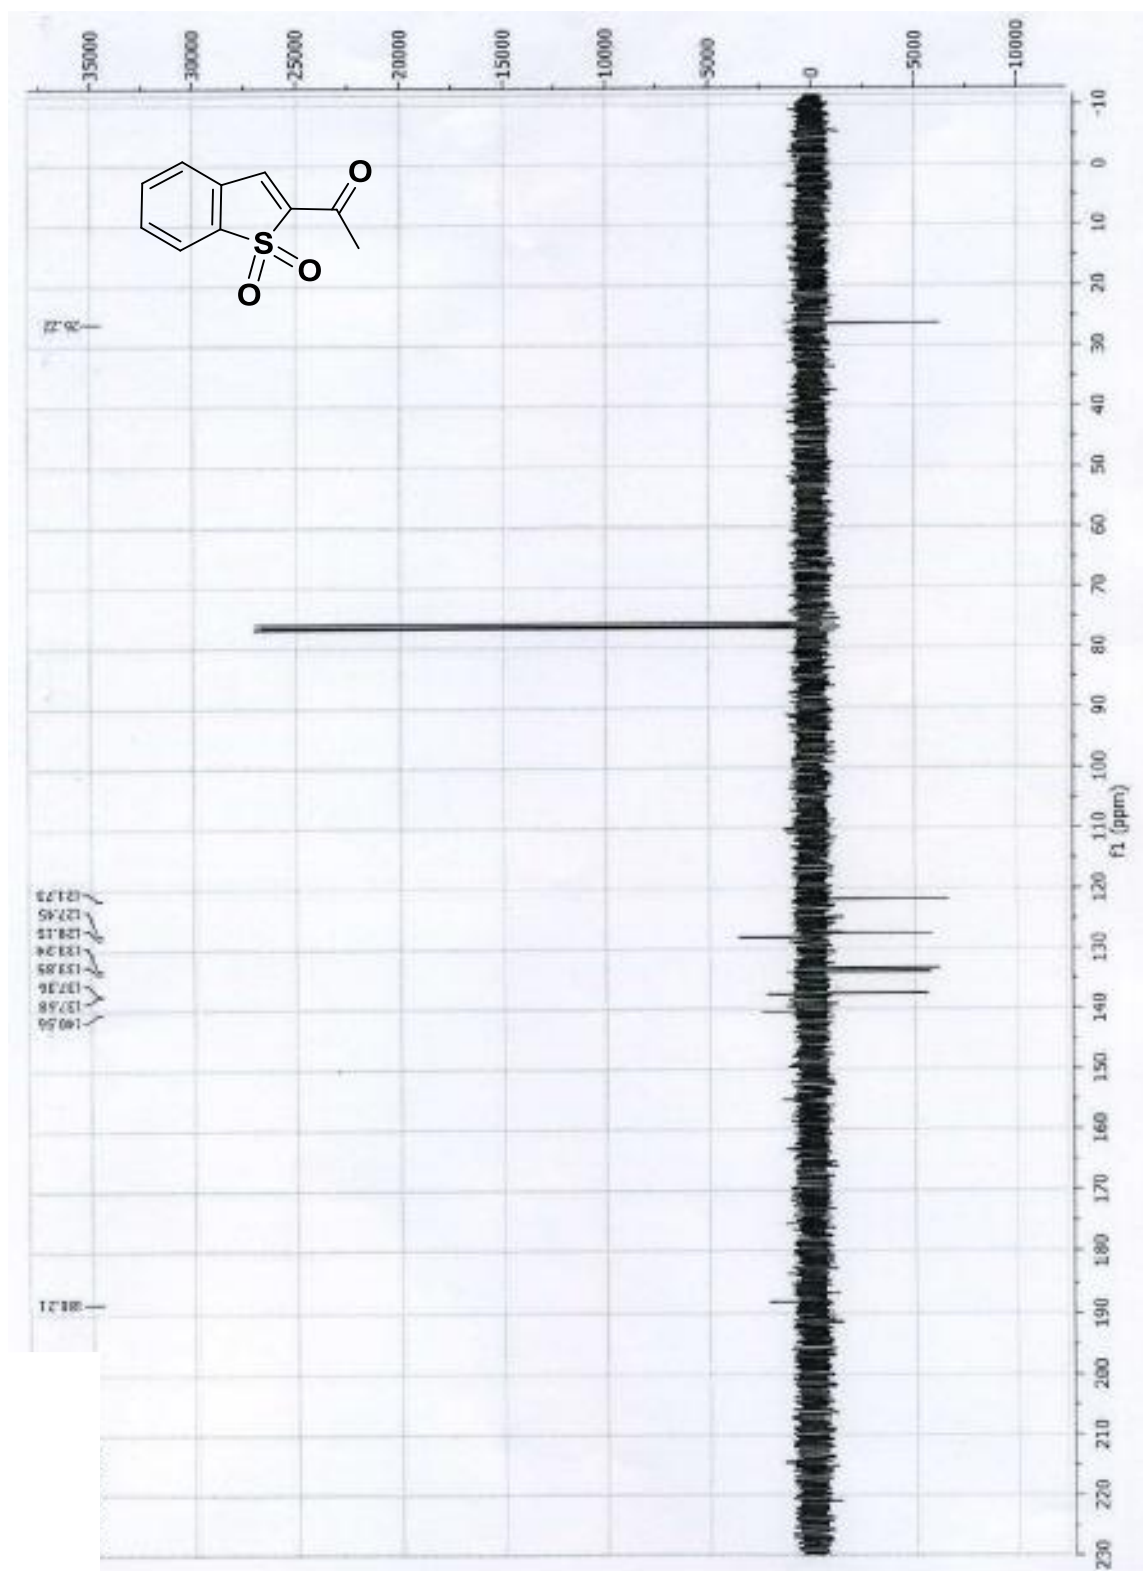

Fig. 4.  $^{13}\text{C}$  [1H] APT NMR.

Cite this: DOI: 10.1039/c0xx00000x

www.rsc.org/xxxxxx

# COMMUNICATION

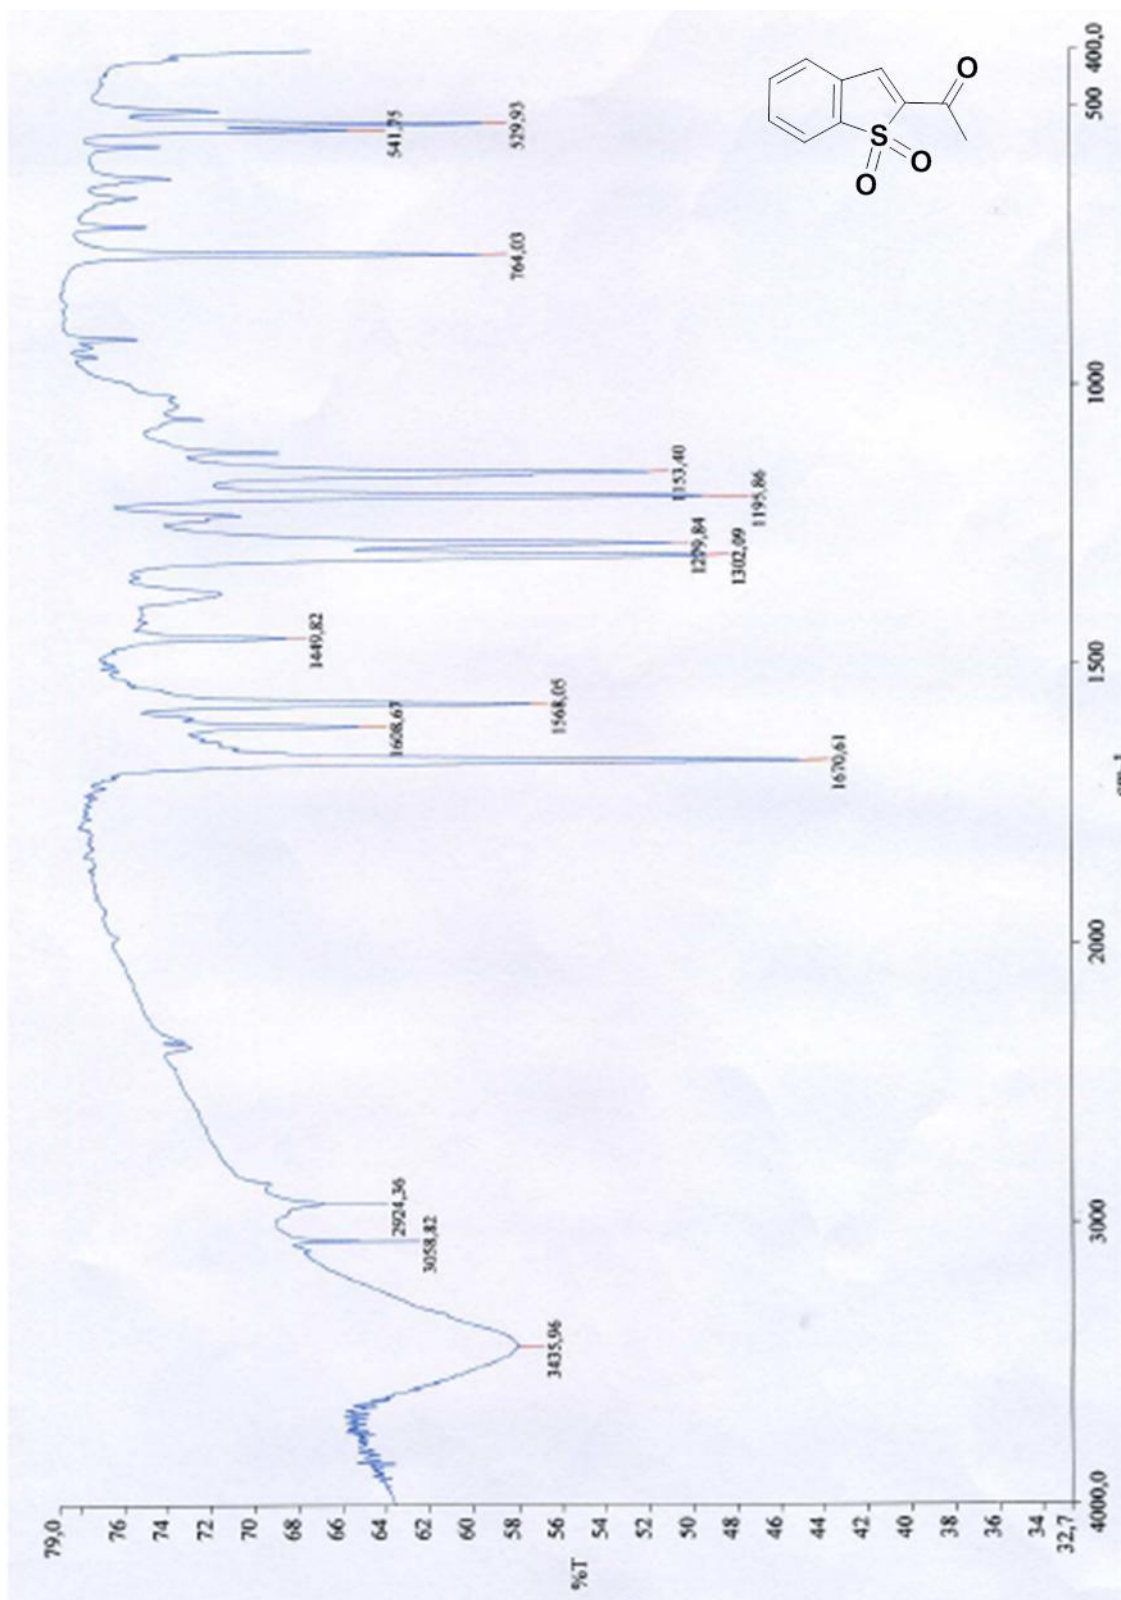

Fig. 5. FT-IR spectra.

Cite this: DOI: 10.1039/c0xx00000x

www.rsc.org/xxxxxx

# COMMUNICATION

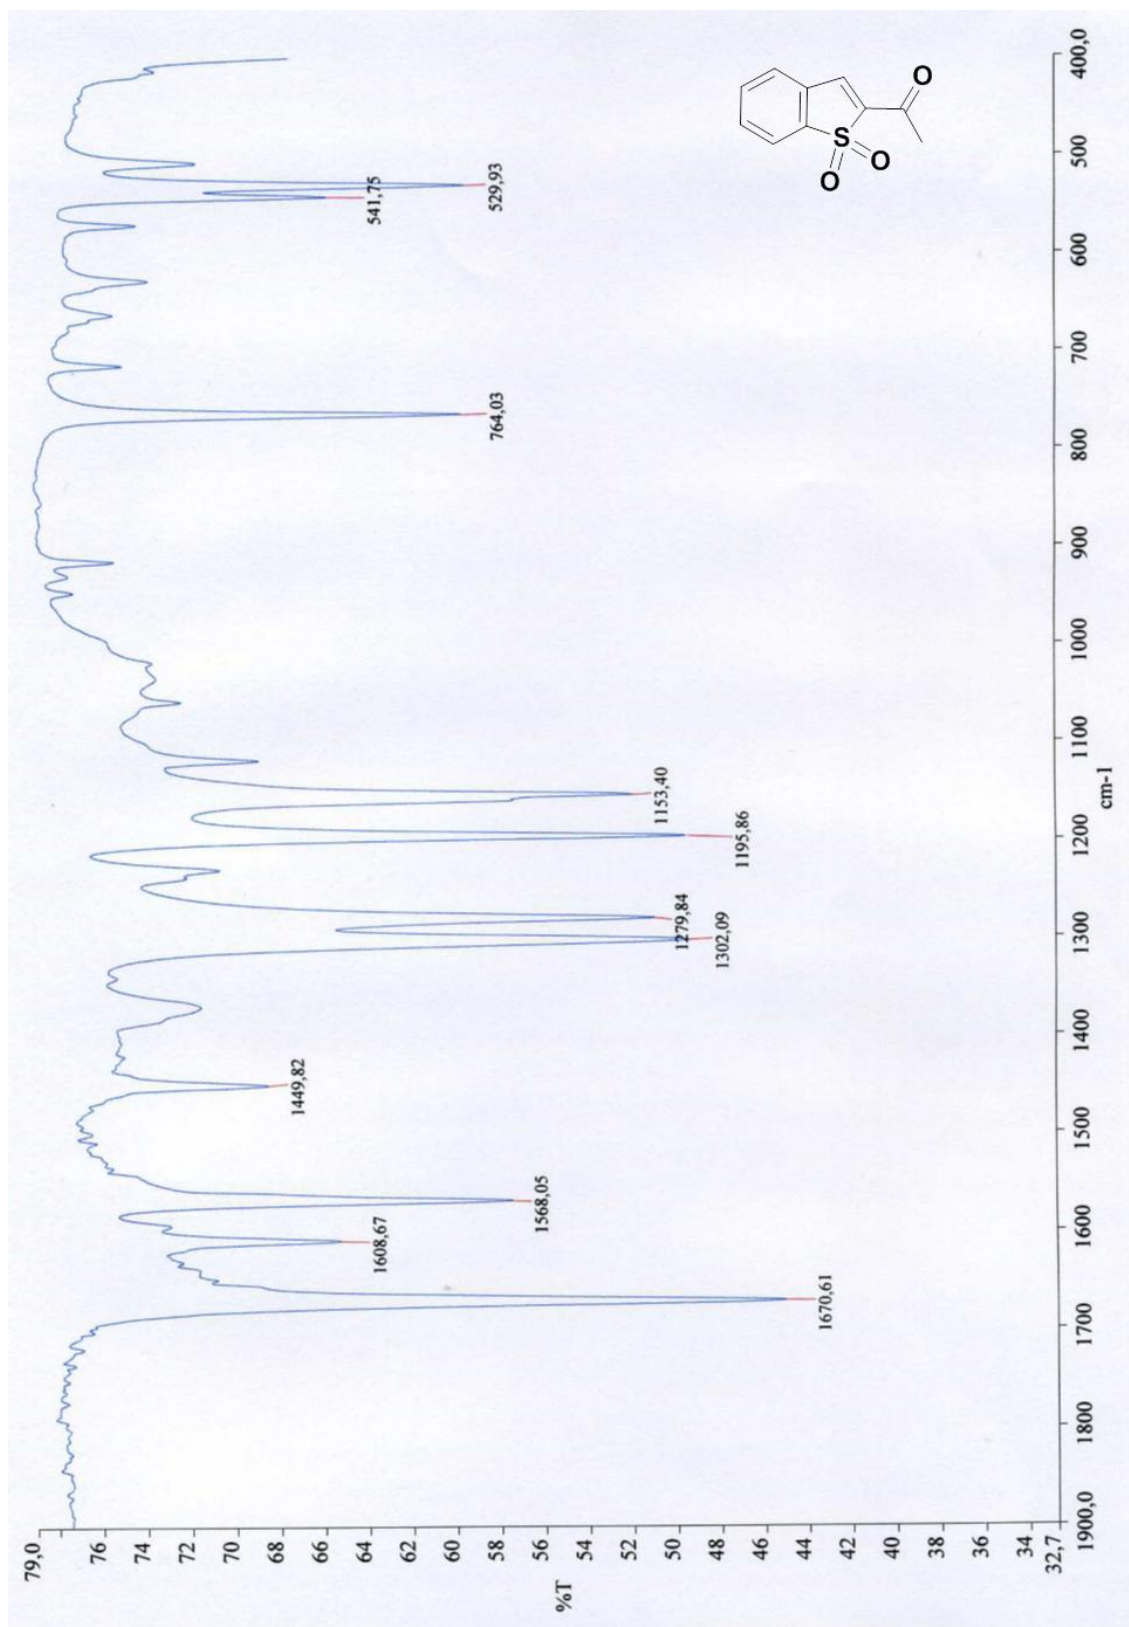

Fig. 6. FT-IR spectra.
